# Supplementary material for: Grunt variation in the oyster toadfish Opsanus tau: effect of size and sex
Source: PeerJ. 2015 Oct 15;3:e1330. doi: 10.7717/peerj.1330 (PMC4662586; doi:10.7717/peerj.1330)
Supplement: Supplemental Information 1 [file peerj-03-1330-s001.xls]

## Sheet: Sheet1
Date	Fish ID	Mass	Sex (male=1)	SPL max	SPL mean	SDV of mean	SPL min	range	Freq.	# of grunts	#of rec.	Length	(LOG(mass)+5.1172)/3.1358	total lenght
1989-07-06	7/6-F4-T1-M-559	559	1	72	70.5	2.38	67	5	142	4	1	2.50801	2.50801	322.113
1997-07-06	7/6-f5-t1-m-672	672	1	78	72.5		67	11	149.2	22	1	2.53351	2.53351	341.591
1997-07-06	7/6-f6-t1-m-623	623	1	70	68.8	1.07	67	3	142	7	1	2.52302	2.52302	333.443
1997-07-06	7/6-f1-t1-f-64	64	2	45	41.75	2.71	38	7	142	8	1	2.20785	2.20785	161.38
1997-07-06	7/6-f3-t1-m-29	29	1	62	54.57		28		170	18	1	2.09822	2.09822	125.378
1997-07-06	7/6-f5-t1-m-493	493	1	72	71.75	0.45	71	1	160	12	1	2.49061	2.49061	309.462
1997-07-17	7/17-f4-t4-f-170	168	2	64	57.85	1.44	54	10	125	22	2	2.34151	2.34151	219.539
1997-07-17	7/17-f5-t4-m-247	247	1	60	57.75	1.42	54	6	155	11	1	2.39489	2.39489	248.25
1997-07-19	7/19-f5-t4-m-112	112	1	51	47.66	2.25	46	5	151.67	6	1	2.28536	2.28536	192.911
1997-07-17	7/19-f3-t5-f-203	203	2	64	62.12	0.78	60	4	111	26	1	2.36772	2.36772	233.195
1997-07-19	7/19-f1-t1-f-185	185	1	67	62.87	6.15	53	14	121.67	8	2	2.35486	2.35486	226.392
1997-07-19	7/19-f1-t5-f-452	452	2	66	64.46	1.18	62	4	123.33	15	1	2.47858	2.47858	301.011
1997-07-19	7/19-f2-t3-f-330	330	2	75	65.88	3.88	62	13	115	9	2	2.43501	2.43501	272.278
1997-07-19	7/19-f1-t3-m-608	608	1	79	76.81	1.79	74	5	128	16	2	2.51965	2.51965	330.861
1997-07-19	7/19-f4-t1-f-203	203	2	62	61	1.73	59	3	125	3	1	2.36772	2.36772	233.195
1997-07-19	7/19-f5-t5-m-134	134	1	65	61.26	2.07	57	8	135	26	1	2.31019	2.31019	204.265
1997-07-19	7/19-f2-t5-f-252	252	2	65	61	2.66	58	7	127	12	1	2.39767	2.39767	249.842
1997-07-19	7/19-f5-t2-f-275	275	2	58	57.42	0.53	57	1		6	1	2.40976	2.40976	256.899
1997-07-24	7/24-f1-t3-m-608	608	1								1	2.51965	2.51965	330.861
1997-07-24	7/24-f3-t3-m-270	270	1	74	69		66	8	143	16	1	2.40722	2.40722	255.4
1997-07-24	7/24-f2-t5-f-448	448	2	71	67.56	1.56	66	5	132	32	1	2.47735	2.47735	300.159
1997-07-24	7/24-f5-t1-f-168	168	2	78	73.3	2.05	71	7	166	9	1	2.34151	2.34151	219.539
1997-07-24	7/24-f5-t2-f-192	192	2	67	64.7	1.25	63	4	145.2	10	1	2.36	2.36	229.089
1997-07-24	7/24-f5-t5-m-129	129	1	72	65	3.07	62	10	137.4	8	1	2.30493	2.30493	201.803
1997-07-24	7/24-f3-t5-f-203	203	2	64	62.8	1.13	61	3	134.14	10	1	2.36772	2.36772	233.195
1997-07-24	7/24-f5-t4-m-111	111	1	59	57.87	0.64	57	2	97	8	1	2.28411	2.28411	192.359
1997-07-24	7/24-f1-t1-f-169	189	2	74	70.92	2.63	66	8	187.25	13	1	2.35782	2.35782	227.941
1994-07-24	7/24-f4-t4-f-184	184	2	64	60.26	3.23	52	12	115	15	1	2.35411	2.35411	226.001
1997-07-24	7/24-f2-t3-f-319	319	2	67	64.75	2.62	62	5		4	1	2.43032	2.43032	269.351
1989-08-18	8/18-f1-t10-m-215	215	1	81	75.68	1.7	73	8	142	22	1	2.37567	2.37567	237.506
1989-08-18	8/18-f4-t6-m-385	385	1	73	64.83	3.83	60	13	121.75	12	1	2.45636	2.45636	285.997
1989-08-18	8/18-f5-t11-f-185	185	2	74	72.6	1.51	71	3	124.5	5	1	2.35486	2.35486	226.392
1989-08-18	8/18-f3-t8-m-352	352	1	77	75	2.16	72	5	128	4	1	2.44395	2.44395	277.94
1989-08-18	8/18-f3-t9-f-233	233	2	75	72.57	1.5	70	5	153.25	14	1	2.38681	2.38681	243.674
1998-08-18	8/18-f9-t6-m-228	228	1	81	78		1.64	6	183	27	1	2.3838	2.38381	241.994
1998-08-18	8/18-f5-t6-m-513	513	1	71	70.2	0.83	69	2	146.8	5	1	2.49611	2.49612	313.412
1989-08-18	8/18-f3-t6-f-544	544	2	75	70.2	3.04	64	11	142	10	1	2.50424	2.50424	319.331
1998-08-18	8/18-f5-t10-m-205	205	1	78	75.66	1.49	72	6	171	27	1	2.36908	2.36908	233.926
1989-08-18	8/18-f4-t10-351	351	2	75	71.48	2.63	66	9	106	27	1	2.44356	2.44356	277.688
1989-08-18	8/18-f1-t11-f-233	233	1	76	72.62	1.91	68	8	127	27	1	2.38681	2.38681	243.674
1989-08-18	8/18-f2-t11-f-137	137	2	64	63.15	1.13	61	3	150	20	1	2.31326	2.31326	205.712
1989-08-18	8/18-f3-t11-m-150	150	1	70	67.57	2.14	65	5	160	7	1	2.32582	2.32581	211.746
1989-08-18	8/18-f2-t10-m-307	307	1	79	72.61	2.36	70	9	134.4	9	1	2.42501	2.42501	266.077
1989-08-18	8/18-f3-t10-m-197	197	1	71	67.85	1.22	64	7	121	20	1	2.36356	2.36356	230.975
1989-08-18	8/18-f1-t9-m-340	340	1	71	70.05		69	3	127	20	1	2.43915	2.43915	274.883
1989-08-18	8/18-f6-t6-m-394	394	1	78	75.86		72	6	142	15	1	2.45956	2.45956	288.113
1989-08-18	8/18-f8-t6-m-160	160	1	71	68.8	2.61	64	9	146.5	7	2	2.33475	2.33475	216.149
1989-08-18	8/18-f1-t7-f-192	192	2	81	77.81	1.52	75	6	160	28	2	2.36	2.36	229.089
1989-08-18	8/18-f2b-t6-m-760	760	1	75	66.58	2.85	64	11	124.25	17	1	2.55055	2.55055	355.263
1989-08-18	8/18-f2-t6-f-418	418	2	77	73.25	2.51	71	6	142	16	1	2.46775	2.46775	293.597
1989-08-18	8/18-f2-t8-f-339	339	2	78	72.43	3.81	65	13	160	16	2	2.43874	2.43874	274.625
1989-08-18	8/18-f4-t8-m-223	223	1	78	76.48	1.22	74	4	142	27	2	2.38073	2.38073	240.289
1989-08-18	8/18-f4a-t6-f-567	567	2	73	64.38	3.05	60	13	128.5	21	1	2.50998	2.50998	323.576
1989-08-18	8/18-f1-t8-m-349	349	1	80	78.36	1.06	75	5	146.2	30	1	2.44277	2.44277	277.183
1996-02-20	2/20-f3-t1-m-144	144	1	66	63.5			10	113	30	1	2.32016	2.32016	209.008
1993-01-27	1/27-f2-t1-m-70.5	70.5	1	63	59.8	2.65	55	8	125	11	1	2.22125	2.22125	166.436
1993-12-25	12/25-f1a-t1-f-52	52	2	57	54.25	1.16	53	4		8	1	2.17909	2.17909	151.041

## Sheet: Sheet5
Date	Fish ID	Mass
1989-07-06	7/6-F4-T1-M-559	559
1997-07-06	7/6-f5-t1-m-672	672
1997-07-06	7/6-f6-t1-m-623	623
1997-07-06	7/6-f1-t1-f-64	64
1997-07-06	7/6-f3-t1-m-29	29
1997-07-06	7/6-f5-t1-m-493	493
1997-07-17	7/17-f4-t4-f-170	168
1997-07-17	7/17-f5-t4-m-247	247
1997-07-19	7/19-f5-t4-m-112	112
1997-07-17	7/19-f3-t5-f-203	203
1997-07-19	7/19-f1-t1-f-185	185
1997-07-19	7/19-f1-t5-f-452	452
1997-07-19	7/19-f2-t3-f-330	330
1997-07-19	7/19-f1-t3-m-608	608
1997-07-19	7/19-f4-t1-f-203	203
1997-07-19	7/19-f5-t5-m-134	134
1997-07-19	7/19-f2-t5-f-252	252
1997-07-19	7/19-f5-t2-f-275	275
1997-07-24	7/24-f1-t3-m-608	608
1997-07-24	7/24-f3-t3-m-270	270
1997-07-24	7/24-f2-t5-f-448	448
1997-07-24	7/24-f5-t1-f-168	168
1997-07-24	7/24-f5-t2-f-192	192
1997-07-24	7/24-f5-t5-m-129	129
1997-07-24	7/24-f3-t5-f-203	203
1997-07-24	7/24-f5-t4-m-111	111
1997-07-24	7/24-f1-t1-f-169	189
1994-07-24	7/24-f4-t4-f-184	184
1997-07-24	7/24-f2-t3-f-319	319
1989-08-18	8/18-f1-t10-m-215	215
1989-08-18	8/18-f4-t6-m-385	385
1989-08-18	8/18-f5-t11-f-185	185
1989-08-18	8/18-f3-t8-m-352	352
1989-08-18	8/18-f3-t9-f-233	233
1998-08-18	8/18-f9-t6-m-228	228
1998-08-18	8/18-f5-t6-m-513	513
1989-08-18	8/18-f3-t6-f-544	544
1998-08-18	8/18-f5-t10-m-205	205
1989-08-18	8/18-f4-t10-351	351
1989-08-18	8/18-f1-t11-f-233	233
1989-08-18	8/18-f2-t11-f-137	137
1989-08-18	8/18-f3-t11-m-150	150
1989-08-18	8/18-f2-t10-m-307	307
1989-08-18	8/18-f3-t10-m-197	197
1989-08-18	8/18-f1-t9-m-340	340
1989-08-18	8/18-f6-t6-m-394	394
1989-08-18	8/18-f8-t6-m-160	160
1989-08-18	8/18-f1-t7-f-192	192
1989-08-18	8/18-f2b-t6-m-760	760
1989-08-18	8/18-f2-t6-f-418	418
1989-08-18	8/18-f2-t8-f-339	339
1989-08-18	8/18-f4-t8-m-223	223
1989-08-18	8/18-f4a-t6-f-567	567
1989-08-18	8/18-f1-t8-m-349	349
1996-02-20	2/20-f3-t1-m-144	144
1993-01-27	1/27-f2-t1-m-70.5	70.5
1993-12-25	12/25-f1a-t1-f-52	52
